# Supplementary material
Source: PubMed Central journal article supplement (PMC3416195)
Supplement: MCB.00356-12_zmb999109554so1.pdf [file MCB.00356-12_zmb999109554so1.pdf]

Live image legend:

T cells were loaded with lysotracker red (Invitrogen) to label granules. EL4 target cells were loaded with calcein dye (Invitrogen) which retains in live cells and is lost upon membrane permeabilization. Live images were recorded at intervals of 45s for 30 mins, and performed with the 40x objective on a Zeiss Observer D1 station equipped with a humidified environmental chamber, a CoolSNAP<sub>HQ</sub> CCD camera (Roper Scientific) and driven by MetaMorph Software.
